# Supplementary material
Source: MDPI journal article supplement (https://www.mdpi.com/1996-1073/17/10/2336)
Supplement: s1 [file s1]

| Emission factor in 2019 |                             |                         |              |                       |                   |                       |                   |                       |                   |                       |                   |                       |                   |                       |                   |                       |                   |                       |                   |                       |                   |
|-------------------------|-----------------------------|-------------------------|--------------|-----------------------|-------------------|-----------------------|-------------------|-----------------------|-------------------|-----------------------|-------------------|-----------------------|-------------------|-----------------------|-------------------|-----------------------|-------------------|-----------------------|-------------------|-----------------------|-------------------|
| Vehicle type            | Technology /Engine standard | Annual average VKT (km) | Fuel type    | EF start-up (g/start) | EF running (g/km) |
| Passenger car           | Euro 1                      | >161,000                | Gasoline     | 2.44                  | 9.56              | 0.33                  | 0.09              | 0.07                  | 0.01              | 0.06                  | 0.05              | 0.00                  | 0.00              | 0.00                  | 0.00              | 0.79                  | 6.26              | 0.00                  | 0.00              | 0.07                  | 0.02              |
|                         | Euro 2                      | >161,000                |              | 3.30                  | 12.91             | 0.56                  | 0.15              | 0.28                  | 0.04              | 0.13                  | 0.11              | 0.00                  | 0.00              | 0.01                  | 0.00              | 2.97                  | 23.62             | 0.00                  | 0.00              | 0.11                  | 0.03              |
|                         | Euro 3                      | >161,000                |              | 5.25                  | 14.95             | 0.25                  | 0.06              | 0.55                  | 0.07              | 0.16                  | 0.11              | 0.00                  | 0.00              | 0.00                  | 0.00              | 6.88                  | 54.74             | 0.01                  | 0.00              | 0.05                  | 0.01              |
|                         | Euro 4                      | <79,000                 |              | 0.56                  | 0.22              | 0.04                  | 0.00              | 0.01                  | 0.00              | 0.02                  | 0.01              | 0.00                  | 0.00              | 0.00                  | 0.00              | 2.94                  | 23.40             | 0.00                  | 0.00              | 0.01                  | 0.00              |
|                         | Euro 4                      | <79,000                 |              | 0.99                  | 0.14              | 0.07                  | 0.00              | 0.02                  | 0.01              | 0.05                  | 0.01              | 0.00                  | 0.00              | 0.00                  | 0.00              | 5.14                  | 103.00            | 0.00                  | 0.00              | 0.01                  | 0.00              |
|                         | Euro 4                      | 80,000-161,000          |              | 2.26                  | 2.96              | 0.18                  | 0.02              | 0.08                  | 0.03              | 0.13                  | 0.09              | 0.00                  | 0.00              | 0.00                  | 0.00              | 9.68                  | 77.03             | 0.01                  | 0.00              | 0.04                  | 0.01              |
|                         | Hybrid                      | <79,000                 |              | 0.02                  | 0.02              | 0.00                  | 0.00              | 0.00                  | 0.00              | 0.00                  | 0.00              | 0.00                  | 0.00              | 0.00                  | 0.00              | 0.06                  | 0.49              | 0.00                  | 0.00              | 0.00                  | 0.00              |
|                         | Hybrid                      | <79,000                 |              | 0.00                  | 0.00              | 0.00                  | 0.00              | 0.00                  | 0.00              | 0.00                  | 0.00              | 0.00                  | 0.00              | 0.00                  | 0.00              | 0.00                  | 0.00              | 0.00                  | 0.00              | 0.00                  | 0.00              |
|                         | Hybrid                      | 80,000-161,000          |              | 0.00                  | 0.00              | 0.00                  | 0.00              | 0.00                  | 0.00              | 0.00                  | 0.00              | 0.00                  | 0.00              | 0.00                  | 0.00              | 0.00                  | 0.00              | 0.00                  | 0.00              | 0.00                  | 0.00              |
|                         | Hybrid                      | >161,000                |              | 0.18                  | 0.48              | 0.01                  | 0.00              | 0.02                  | 0.00              | 0.01                  | 0.01              | 0.00                  | 0.00              | 0.00                  | 0.00              | 0.23                  | 1.85              | 0.00                  | 0.00              | 0.00                  | 0.00              |
|                         | Carburetor/mix              | <79,000                 | NGV modified | 0.12                  | 0.18              | 0.00                  | 0.00              | 0.00                  | 0.00              | 0.00                  | 0.00              | 0.00                  | 0.00              | 0.00                  | 0.00              | 0.11                  | 0.74              | 0.00                  | 0.00              | 0.02                  | 0.01              |
|                         | Carburetor/mix              | <79,000                 |              | 0.21                  | 0.84              | 0.00                  | 0.00              | 0.00                  | 0.00              | 0.01                  | 0.01              | 0.00                  | 0.00              | 0.00                  | 0.00              | 0.16                  | 1.15              | 0.00                  | 0.00              | 0.04                  | 0.03              |
|                         | Carburetor/mix              | 80,000-161,000          |              | 0.49                  | 1.93              | 0.00                  | 0.00              | 0.00                  | 0.00              | 0.01                  | 0.02              | 0.00                  | 0.00              | 0.00                  | 0.00              | 0.32                  | 2.22              | 0.00                  | 0.00              | 0.09                  | 0.10              |
|                         | Carburetor/mix              | >161,000                |              | 0.64                  | 0.00              | 0.00                  | 0.00              | 0.03                  | 0.00              | 0.02                  | 0.00              | 0.00                  | 0.00              | 0.00                  | 0.00              | 0.37                  | 9.88              | 0.00                  | 0.00              | 0.13                  | 0.18              |
|                         | Carburetor/mix              | <79,000                 | LPG          | 0.95                  | 1.43              | 0.02                  | 0.01              | 0.00                  | 0.00              | 0.02                  | 0.03              | 0.00                  | 0.00              | 0.00                  | 0.00              | 0.48                  | 3.34              | 0.00                  | 0.00              | 0.01                  | 0.00              |
|                         | Carburetor/mix              | <79,000                 |              | 1.68                  | 6.59              | 0.03                  | 0.03              | 0.00                  | 0.00              | 0.06                  | 0.09              | 0.00                  | 0.00              | 0.00                  | 0.00              | 0.74                  | 5.16              | 0.00                  | 0.00              | 0.01                  | 0.01              |
|                         | Carburetor/mix              | 80,000-161,000          |              | 3.79                  | 15.04             | 0.07                  | 0.09              | 0.01                  | 0.00              | 0.13                  | 0.18              | 0.00                  | 0.00              | 0.00                  | 0.00              | 1.41                  | 9.86              | 0.00                  | 0.00              | 0.02                  | 0.03              |
|                         | Carburetor/mix              | >161,000                |              | 5.03                  | 23.04             | 0.11                  | 0.16              | 0.11                  | 0.01              | 0.18                  | 0.21              | 0.00                  | 0.00              | 0.00                  | 0.00              | 1.64                  | 11.53             | 0.00                  | 0.00              | 0.04                  | 0.05              |
|                         | Euro 1                      | >161,000                | Diesel       | 0.07                  | 0.01              | 0.01                  | 0.00              | 0.00                  | 0.00              | 0.00                  | 0.01              | 0.00                  | 0.00              | 0.01                  | 0.00              | 0.96                  | 3.36              | 0.00                  | 0.00              | 0.00                  | 0.00              |
|                         | Euro 2                      | >161,000                |              | 0.23                  | 0.03              | 0.01                  | 0.00              | 0.00                  | 0.00              | 0.01                  | 0.05              | 0.00                  | 0.00              | 0.03                  | 0.01              | 3.60                  | 12.66             | 0.00                  | 0.00              | 0.00                  | 0.00              |
|                         | Euro 3                      | >161,000                |              | 0.15                  | 0.02              | 0.02                  | 0.00              | 0.00                  | 0.00              | 0.02                  | 0.12              | 0.00                  | 0.00              | 0.05                  | 0.01              | 8.14                  | 28.60             | 0.00                  | 0.00              | 0.00                  | 0.00              |
|                         | Euro 4                      | <79,000                 |              | 0.04                  | 0.01              | 0.00                  | 0.00              | 0.00                  | 0.00              | 0.01                  | 0.03              | 0.00                  | 0.00              | 0.01                  | 0.00              | 3.24                  | 11.39             | 0.00                  | 0.00              | 0.00                  | 0.00              |
|                         | Euro 4                      | <79,000                 |              | 0.06                  | 0.01              | 0.00                  | 0.00              | 0.00                  | 0.00              | 0.01                  | 0.05              | 0.00                  | 0.00              | 0.02                  | 0.00              | 5.50                  | 19.30             | 0.00                  | 0.00              | 0.00                  | 0.00              |
|                         | Euro 4                      | 80,000-161,000          |              | 0.14                  | 0.02              | 0.01                  | 0.00              | 0.00                  | 0.00              | 0.02                  | 0.10              | 0.00                  | 0.00              | 0.04                  | 0.00              | 10.61                 | 37.27             | 0.01                  | 0.00              | 0.00                  | 0.00              |

| Emission factor in 2019 |                             |                         |              |                       |                   |                       |                   |                       |                   |                       |                   |                       |                   |                       |                   |                       |                   |                       |                   |                       |                   |
|-------------------------|-----------------------------|-------------------------|--------------|-----------------------|-------------------|-----------------------|-------------------|-----------------------|-------------------|-----------------------|-------------------|-----------------------|-------------------|-----------------------|-------------------|-----------------------|-------------------|-----------------------|-------------------|-----------------------|-------------------|
| Vehicle type            | Technology /Engine standard | Annual average VKT (km) | Fuel type    | EF start-up (g/start) | EF running (g/km) |
|                         | Electric                    | Any                     | Electric     | 0.00                  | 0.00              | 0.00                  | 0.00              | 0.00                  | 0.00              | 0.00                  | 0.00              | 0.00                  | 0.00              | 0.00                  | 0.00              | 0.00                  | 0.00              | 0.00                  | 0.00              | 0.00                  | 0.00              |
|                         |                             |                         |              | 28.64                 | 90.37             | 1.75                  | 0.63              | 1.19                  | 0.18              | 1.05                  | 1.30              | 0.00                  | 0.00              | 0.18                  | 0.04              | 65.95                 | 446.86            | 0.04                  | 0.01              | 0.66                  | 0.50              |
| Motorcycle              | 4 cycle / Carburetor        | >50,000                 | Gasoline     | 2.95                  | 2.72              | 0.62                  | 0.42              | 0.14                  | 0.06              | 0.13                  | 0.05              | 0.00                  | 0.00              | 0.04                  | 0.02              | 2.95                  | 14.51             | 0.00                  | 0.00              | 0.15                  | 0.15              |
|                         | 4 cycle /FI                 | <25,000                 |              | 7.27                  | 17.56             | 1.77                  | 0.66              | 0.19                  | 0.02              | 0.33                  | 0.14              | 0.00                  | 0.00              | 0.05                  | 0.04              | 10.00                 | 55.12             | 0.00                  | 0.00              | 0.36                  | 0.20              |
|                         | 4 cycle /FI                 | 26,000-50,000           |              | 5.01                  | 11.28             | 1.24                  | 0.43              | 0.15                  | 0.05              | 0.26                  | 0.11              | 0.00                  | 0.00              | 0.04                  | 0.03              | 6.48                  | 35.94             | 0.00                  | 0.00              | 0.26                  | 0.14              |
|                         | 4 cycle /FI                 | >50,000                 |              | 1.50                  | 3.22              | 0.39                  | 0.13              | 0.05                  | 0.04              | 0.09                  | 0.04              | 0.00                  | 0.00              | 0.01                  | 0.01              | 1.82                  | 10.20             | 0.00                  | 0.00              | 0.09                  | 0.04              |
|                         |                             |                         |              | 16.72                 | 34.78             | 4.02                  | 1.64              | 0.52                  | 0.17              | 0.80                  | 0.33              | 0.00                  | 0.00              | 0.14                  | 0.10              | 21.26                 | 115.78            | 0.00                  | 0.00              | 0.85                  | 0.54              |
|                         |                             |                         |              |                       |                   |                       |                   |                       |                   |                       |                   |                       |                   |                       |                   |                       |                   |                       |                   |                       |                   |
| Van                     | Euro 1                      | >161,000                | Gasoline     | 0.30                  | 0.92              | 0.04                  | 0.01              | 0.01                  | 0.00              | 0.01                  | 0.01              | 0.00                  | 0.00              | 0.00                  | 0.00              | 0.10                  | 0.72              | 0.00                  | 0.00              | 0.01                  | 0.00              |
|                         | Euro 2                      | >161,000                |              | 0.38                  | 1.17              | 0.06                  | 0.02              | 0.03                  | 0.00              | 0.02                  | 0.01              | 0.00                  | 0.00              | 0.00                  | 0.00              | 0.34                  | 2.57              | 0.00                  | 0.00              | 0.01                  | 0.00              |
|                         | Euro 3                      | >161,000                |              | 0.86                  | 1.93              | 0.04                  | 0.01              | 0.09                  | 0.01              | 0.03                  | 0.02              | 0.00                  | 0.00              | 0.00                  | 0.00              | 1.12                  | 8.44              | 0.00                  | 0.00              | 0.01                  | 0.00              |
|                         | Euro 4                      | <79,000                 |              | 0.14                  | 0.03              | 0.01                  | 0.00              | 0.00                  | 0.00              | 0.01                  | 0.00              | 0.00                  | 0.00              | 0.00                  | 0.00              | 0.72                  | 5.45              | 0.00                  | 0.00              | 0.00                  | 0.00              |
|                         | Euro 4                      | 80,000-161,000          |              | 0.14                  | 0.15              | 0.01                  | 0.00              | 0.01                  | 0.00              | 0.01                  | 0.01              | 0.00                  | 0.00              | 0.00                  | 0.00              | 0.60                  | 4.53              | 0.00                  | 0.00              | 0.00                  | 0.00              |
|                         | Euro 4                      | >161,000                |              | 0.13                  | 0.28              | 0.01                  | 0.00              | 0.04                  | 0.00              | 0.01                  | 0.01              | 0.00                  | 0.00              | 0.00                  | 0.00              | 0.48                  | 3.59              | 0.00                  | 0.00              | 0.00                  | 0.00              |
|                         | Carburetor/mix              | <79,000                 | NGV modified | 0.46                  | 1.56              | 0.00                  | 0.00              | 0.00                  | 0.00              | 0.01                  | 0.02              | 0.00                  | 0.00              | 0.00                  | 0.00              | 0.35                  | 2.37              | 0.00                  | 0.00              | 0.08                  | 0.06              |
|                         | Carburetor/mix              | 80,000-161,000          |              | 0.45                  | 1.57              | 0.00                  | 0.00              | 0.00                  | 0.00              | 0.01                  | 0.02              | 0.00                  | 0.00              | 0.00                  | 0.00              | 0.29                  | 1.99              | 0.00                  | 0.00              | 0.08                  | 0.08              |
|                         | Carburator/mix              | >161,000                |              | 1.84                  | 7.35              | 0.01                  | 0.01              | 0.08                  | 0.01              | 0.05                  | 0.06              | 0.00                  | 0.00              | 0.00                  | 0.00              | 1.06                  | 7.12              | 0.00                  | 0.00              | 0.39                  | 0.46              |
|                         | Carburator/mix              | <79,000                 | LPG          | 0.99                  | 3.38              | 0.02                  | 0.01              | 0.00                  | 0.00              | 0.03                  | 0.05              | 0.00                  | 0.00              | 0.00                  | 0.00              | 0.43                  | 2.92              | 0.00                  | 0.00              | 0.01                  | 0.00              |
|                         | Carburator/mix              | 80,000-161,000          |              | 0.97                  | 3.37              | 0.02                  | 0.02              | 0.00                  | 0.00              | 0.03                  | 0.05              | 0.00                  | 0.00              | 0.00                  | 0.00              | 0.36                  | 2.43              | 0.00                  | 0.00              | 0.01                  | 0.01              |
|                         | Carburator/mix              | >161,000                |              | 3.94                  | 15.75             | 0.09                  | 0.11              | 0.09                  | 0.01              | 0.14                  | 0.17              | 0.00                  | 0.00              | 0.00                  | 0.00              | 1.29                  | 8.68              | 0.00                  | 0.00              | 0.03                  | 0.04              |
|                         | Euro 1                      | >161,000                | Diesel       | 0.23                  | 0.03              | 0.02                  | 0.00              | 0.00                  | 0.00              | 0.01                  | 0.04              | 0.00                  | 0.00              | 0.03                  | 0.01              | 3.02                  | 10.27             | 0.00                  | 0.00              | 0.00                  | 0.00              |
|                         | Euro 2                      | >161,000                |              | 0.69                  | 0.08              | 0.04                  | 0.01              | 0.00                  | 0.00              | 0.03                  | 0.14              | 0.00                  | 0.00              | 0.09                  | 0.02              | 10.55                 | 35.85             | 0.00                  | 0.00              | 0.00                  | 0.00              |
|                         | Euro 3                      | >161,000                |              | 0.62                  | 0.06              | 0.06                  | 0.01              | 0.00                  | 0.00              | 0.09                  | 1.66              | 0.00                  | 0.00              | 0.20                  | 0.03              | 33.85                 | 369.21            | 0.00                  | 0.00              | 0.00                  | 0.00              |
|                         | Euro 4                      | <79,000                 |              | 0.22                  | 0.03              | 0.01                  | 0.00              | 0.00                  | 0.00              | 0.03                  | 0.16              | 0.00                  | 0.00              | 0.06                  | 0.01              | 19.75                 | 67.10             | 0.01                  | 0.00              | 0.00                  | 0.00              |
|                         | Euro 4                      | 80,000-161,000          |              | 0.23                  | 0.03              | 0.02                  | 0.00              | 0.00                  | 0.00              | 0.03                  | 3.02              | 0.00                  | 0.00              | 0.07                  | 0.01              | 16.86                 | 1010.07           | 0.01                  | 0.00              | 0.00                  | 0.00              |
|                         | Euro 4                      | >161,000                |              | 0.24                  | 0.03              | 0.02                  | 0.00              | 0.00                  | 0.00              | 0.03                  | 0.15              | 0.00                  | 0.00              | 0.14                  | 0.01              | 13.86                 | 47.09             | 0.01                  | 0.00              | 0.00                  | 0.00              |

| Emission factor in 2019 |                             |                         |              |                       |                   |                       |                   |                       |                   |                       |                   |                       |                   |                       |                   |                       |                   |                       |                   |                       |                   |
|-------------------------|-----------------------------|-------------------------|--------------|-----------------------|-------------------|-----------------------|-------------------|-----------------------|-------------------|-----------------------|-------------------|-----------------------|-------------------|-----------------------|-------------------|-----------------------|-------------------|-----------------------|-------------------|-----------------------|-------------------|
| Vehicle type            | Technology /Engine standard | Annual average VKT (km) | Fuel type    | EF start-up (g/start) | EF running (g/km) |
|                         |                             |                         |              | 12.81                 | 37.69             | 0.48                  | 0.22              | 0.35                  | 0.04              | 0.57                  | 5.59              | 0.00                  | 0.00              | 0.59                  | 0.09              | 105.05                | 1590.40           | 0.03                  | 0.01              | 0.63                  | 0.67              |
| Pickup                  | Euro 1                      | >161,000                | Gasoline     | 0.10                  | 0.29              | 0.01                  | 0.00              | 0.00                  | 0.00              | 0.00                  | 0.00              | 0.00                  | 0.00              | 0.00                  | 0.00              | 0.03                  | 0.23              | 0.00                  | 0.00              | 0.00                  | 0.00              |
|                         | Euro 2                      | >161,000                |              | 0.16                  | 0.48              | 0.03                  | 0.01              | 0.01                  | 0.00              | 0.01                  | 0.01              | 0.00                  | 0.00              | 0.00                  | 0.00              | 0.14                  | 1.05              | 0.00                  | 0.00              | 0.01                  | 0.00              |
|                         | Euro 3                      | >161,000                |              | 0.37                  | 0.81              | 0.02                  | 0.00              | 0.04                  | 0.00              | 0.01                  | 0.01              | 0.00                  | 0.00              | 0.00                  | 0.00              | 0.48                  | 3.58              | 0.00                  | 0.00              | 0.00                  | 0.00              |
|                         | Euro 4                      | <79,000                 |              | 0.05                  | 0.01              | 0.00                  | 0.00              | 0.00                  | 0.00              | 0.00                  | 0.00              | 0.00                  | 0.00              | 0.00                  | 0.00              | 0.28                  | 2.12              | 0.00                  | 0.00              | 0.00                  | 0.00              |
|                         | Euro 4                      | 80,000-161,000          |              | 0.05                  | 0.05              | 0.00                  | 0.00              | 0.00                  | 0.00              | 0.00                  | 0.00              | 0.00                  | 0.00              | 0.00                  | 0.00              | 0.23                  | 1.73              | 0.00                  | 0.00              | 0.00                  | 0.00              |
|                         | Euro 4                      | >161,000                |              | 0.04                  | 0.09              | 0.00                  | 0.00              | 0.01                  | 0.00              | 0.00                  | 0.00              | 0.00                  | 0.00              | 0.00                  | 0.00              | 0.16                  | 1.20              | 0.00                  | 0.00              | 0.00                  | 0.00              |
|                         | Carburator/mix              | <79,000                 | NGV modified | 0.10                  | 0.34              | 0.00                  | 0.00              | 0.00                  | 0.00              | 0.00                  | 0.00              | 0.00                  | 0.00              | 0.00                  | 0.00              | 0.08                  | 0.54              | 0.00                  | 0.00              | 0.02                  | 0.01              |
|                         | Carburator/mix              | 80,000-161,000          |              | 0.10                  | 0.32              | 0.00                  | 0.00              | 0.00                  | 0.00              | 0.00                  | 0.00              | 0.00                  | 0.00              | 0.00                  | 0.00              | 0.07                  | 0.45              | 0.00                  | 0.00              | 0.02                  | 0.02              |
|                         | Carburator/mix              | >161,000                |              | 0.41                  | 1.50              | 0.00                  | 0.00              | 0.02                  | 0.00              | 0.01                  | 0.01              | 0.00                  | 0.00              | 0.00                  | 0.00              | 0.25                  | 1.71              | 0.00                  | 0.00              | 0.09                  | 0.10              |
|                         | Carburator/mix              | <79,000                 | LPG          | 0.46                  | 1.55              | 0.01                  | 0.01              | 0.00                  | 0.00              | 0.02                  | 0.03              | 0.00                  | 0.00              | 0.00                  | 0.00              | 0.21                  | 1.39              | 0.00                  | 0.00              | 0.00                  | 0.00              |
|                         | Carburator/mix              | 80,000-161,000          |              | 0.44                  | 1.43              | 0.01                  | 0.01              | 0.00                  | 0.00              | 0.02                  | 0.02              | 0.00                  | 0.00              | 0.00                  | 0.00              | 0.17                  | 1.15              | 0.00                  | 0.00              | 0.00                  | 0.00              |
|                         | Carburator/mix              | >161,000                |              | 1.81                  | 6.57              | 0.04                  | 0.04              | 0.04                  | 0.01              | 0.07                  | 0.08              | 0.00                  | 0.00              | 0.00                  | 0.00              | 0.63                  | 4.26              | 0.00                  | 0.00              | 0.01                  | 0.01              |
|                         | Euro 1                      | >161,000                | Diesel       | 0.22                  | 0.03              | 0.02                  | 0.00              | 0.00                  | 0.00              | 0.01                  | 0.03              | 0.00                  | 0.00              | 0.03                  | 0.01              | 2.86                  | 9.73              | 0.00                  | 0.00              | 0.00                  | 0.00              |
|                         | Euro 2                      | >161,000                |              | 0.81                  | 0.10              | 0.04                  | 0.01              | 0.00                  | 0.00              | 0.03                  | 0.16              | 0.00                  | 0.00              | 0.10                  | 0.02              | 12.39                 | 42.09             | 0.00                  | 0.00              | 0.00                  | 0.00              |
|                         | Euro 3                      | >161,000                |              | 0.74                  | 0.07              | 0.08                  | 0.01              | 0.00                  | 0.00              | 0.10                  | 1.99              | 0.00                  | 0.00              | 0.24                  | 0.04              | 40.41                 | 440.74            | 0.00                  | 0.00              | 0.00                  | 0.00              |
|                         | Euro 4                      | <79,000                 |              | 0.24                  | 0.03              | 0.02                  | 0.00              | 0.00                  | 0.00              | 0.03                  | 0.18              | 0.00                  | 0.00              | 0.07                  | 0.01              | 21.61                 | 73.43             | 0.01                  | 0.00              | 0.00                  | 0.00              |
|                         | Euro 4                      | 80,000-161,000          |              | 0.24                  | 0.03              | 0.02                  | 0.00              | 0.00                  | 0.00              | 0.03                  | 3.25              | 0.00                  | 0.00              | 0.07                  | 0.01              | 18.12                 | 1085.22           | 0.01                  | 0.00              | 0.00                  | 0.00              |
|                         | Euro 4                      | >161,000                |              | 0.22                  | 0.03              | 0.02                  | 0.00              | 0.00                  | 0.00              | 0.03                  | 0.15              | 0.00                  | 0.00              | 0.12                  | 0.01              | 13.01                 | 44.22             | 0.01                  | 0.00              | 0.00                  | 0.00              |
|                         |                             |                         |              | 6.57                  | 13.70             | 0.32                  | 0.10              | 0.13                  | 0.02              | 0.38                  | 5.93              | 0.00                  | 0.00              | 0.63                  | 0.09              | 111.13                | 1714.83           | 0.03                  | 0.01              | 0.16                  | 0.15              |
| Truck                   | 3 ways/EGR                  | <79,000                 | NGV          | 0.01                  | 0.18              | 0.00                  | 0.00              | 0.00                  | 0.00              | 0.00                  | 0.00              | 0.00                  | 0.00              | 0.00                  | 0.00              | 0.35                  | 3.64              | 0.00                  | 0.00              | 0.00                  | 0.01              |
|                         | 3 ways/EGR                  | 80,000-161,000          |              | 0.00                  | 0.06              | 0.00                  | 0.00              | 0.00                  | 0.00              | 0.00                  | 0.00              | 0.00                  | 0.00              | 0.00                  | 0.00              | 0.12                  | 1.18              | 0.00                  | 0.00              | 0.00                  | 0.00              |
|                         | 3 ways/EGR                  | >161,000                |              | 0.05                  | 1.07              | 0.00                  | 0.00              | 0.07                  | 0.02              | 0.00                  | 0.02              | 0.00                  | 0.00              | 0.00                  | 0.00              | 1.77                  | 18.13             | 0.00                  | 0.00              | 0.00                  | 0.06              |
|                         | 3 ways/EGR                  | <79,000                 | LPG          | 0.00                  | 0.00              | 0.00                  | 0.00              | 0.00                  | 0.00              | 0.00                  | 0.00              | 0.00                  | 0.00              | 0.00                  | 0.00              | 0.01                  | 0.09              | 0.00                  | 0.00              | 0.00                  | 0.00              |

| Emission factor in 2019 |                             |                         |           |                       |                   |                       |                   |                       |                   |                       |                   |                       |                   |                       |                   |                       |                   |                       |                   |                       |                   |
|-------------------------|-----------------------------|-------------------------|-----------|-----------------------|-------------------|-----------------------|-------------------|-----------------------|-------------------|-----------------------|-------------------|-----------------------|-------------------|-----------------------|-------------------|-----------------------|-------------------|-----------------------|-------------------|-----------------------|-------------------|
| Vehicle type            | Technology /Engine standard | Annual average VKT (km) | Fuel type | EF start-up (g/start) | EF running (g/km) |
|                         | 3 ways/EGR                  | 80,000-161,000          |           | 0.00                  | 0.00              | 0.00                  | 0.00              | 0.00                  | 0.00              | 0.00                  | 0.00              | 0.00                  | 0.00              | 0.00                  | 0.00              | 0.00                  | 0.00              | 0.00                  | 0.00              | 0.00                  | 0.00              |
|                         | 3 ways/EGR                  | >161,000                |           | 0.00                  | 0.01              | 0.00                  | 0.00              | 0.00                  | 0.00              | 0.00                  | 0.00              | 0.00                  | 0.00              | 0.00                  | 0.00              | 0.00                  | 0.03              | 0.27                  | 0.00              | 0.00                  | 0.00              |
|                         | Euro 2                      | >161,000                | Diesel    | 0.10                  | 0.37              | 0.01                  | 0.10              | 0.00                  | 0.00              | 0.24                  | 2.11              | 0.00                  | 0.00              | 0.19                  | 0.15              | 19.36                 | 175.34            | 0.00                  | 0.00              | 0.00                  | 0.00              |
|                         | Euro 3                      | <79,000                 |           | 0.06                  | 0.22              | 0.01                  | 0.04              | 0.00                  | 0.00              | 0.10                  | 0.86              | 0.00                  | 0.00              | 0.03                  | 0.02              | 11.15                 | 100.95            | 0.01                  | 0.01              | 0.00                  | 0.00              |
|                         | Euro 3                      | 80,000-161,000          |           | 0.02                  | 0.08              | 0.00                  | 0.01              | 0.00                  | 0.00              | 0.03                  | 0.29              | 0.00                  | 0.00              | 0.02                  | 0.01              | 3.67                  | 33.23             | 0.00                  | 0.00              | 0.00                  | 0.00              |
|                         | Euro 3                      | >161,000                |           | 0.21                  | 0.78              | 0.02                  | 0.15              | 0.00                  | 0.00              | 0.32                  | 2.84              | 0.00                  | 0.00              | 0.35                  | 0.26              | 35.16                 | 318.43            | 0.03                  | 0.04              | 0.00                  | 0.00              |
|                         |                             |                         |           | 0.45                  | 2.78              | 0.04                  | 0.30              | 0.07                  | 0.02              | 0.70                  | 6.12              | 0.00                  | 0.00              | 0.59                  | 0.44              | 71.61                 | 651.27            | 0.05                  | 0.06              | 0.01                  | 0.08              |
| Bus                     | Euro 2                      | >161,000                | Gasoline  | 0.45                  | 10.27             | 0.01                  | 0.16              | 0.04                  | 0.01              | 0.01                  | 0.21              | 0.00                  | 0.00              | 0.00                  | 0.00              | 1.03                  | 10.59             | 0.00                  | 0.00              | 0.00                  | 0.04              |
|                         | Euro 3                      | <79,000                 |           | 0.05                  | 1.23              | 0.00                  | 0.02              | 0.00                  | 0.00              | 0.00                  | 0.02              | 0.00                  | 0.00              | 0.00                  | 0.00              | 0.24                  | 2.47              | 0.00                  | 0.00              | 0.00                  | 0.00              |
|                         | Euro 4                      | 80,000-161,000          |           | 0.03                  | 0.63              | 0.00                  | 0.01              | 0.00                  | 0.00              | 0.00                  | 0.01              | 0.00                  | 0.00              | 0.00                  | 0.00              | 0.10                  | 1.02              | 0.00                  | 0.00              | 0.00                  | 0.00              |
|                         | Euro 4                      | >161,000                |           | 0.37                  | 8.97              | 0.01                  | 0.13              | 0.04                  | 0.01              | 0.01                  | 0.15              | 0.00                  | 0.00              | 0.00                  | 0.00              | 1.05                  | 10.76             | 0.00                  | 0.00              | 0.00                  | 0.03              |
|                         | 3 ways/EGR                  | <79,000                 | NGV       | 0.02                  | 0.58              | 0.00                  | 0.00              | 0.00                  | 0.01              | 0.00                  | 0.01              | 0.00                  | 0.00              | 0.00                  | 0.00              | 1.15                  | 11.79             | 0.00                  | 0.00              | 0.00                  | 0.03              |
|                         | 3 ways/EGR                  | 80,000-161,000          |           | 0.01                  | 0.29              | 0.00                  | 0.00              | 0.00                  | 0.00              | 0.00                  | 0.00              | 0.00                  | 0.00              | 0.00                  | 0.00              | 0.53                  | 5.49              | 0.00                  | 0.00              | 0.00                  | 0.02              |
|                         | 3 ways/EGR                  | >161,000                |           | 0.33                  | 7.16              | 0.00                  | 0.01              | 0.47                  | 0.15              | 0.01                  | 0.11              | 0.00                  | 0.00              | 0.00                  | 0.00              | 11.84                 | 121.63            | 0.01                  | 0.02              | 0.03                  | 0.42              |
|                         | 3 ways/EGR                  | <79,000                 | LPG       | 0.00                  | 0.08              | 0.00                  | 0.00              | 0.00                  | 0.00              | 0.00                  | 0.00              | 0.00                  | 0.00              | 0.00                  | 0.00              | 0.18                  | 1.82              | 0.00                  | 0.00              | 0.00                  | 0.00              |
|                         | 3 ways/EGR                  | 80,000-161,000          |           | 0.00                  | 0.04              | 0.00                  | 0.00              | 0.00                  | 0.00              | 0.00                  | 0.00              | 0.00                  | 0.00              | 0.00                  | 0.00              | 0.08                  | 0.82              | 0.00                  | 0.00              | 0.00                  | 0.00              |
|                         | 3 ways/EGR                  | >161,000                |           | 0.05                  | 1.03              | 0.00                  | 0.01              | 0.07                  | 0.02              | 0.00                  | 0.02              | 0.00                  | 0.00              | 0.00                  | 0.00              | 1.83                  | 18.80             | 0.00                  | 0.00              | 0.00                  | 0.00              |
|                         | Euro 2                      | >161,000                | Diesel    | 0.15                  | 0.56              | 0.02                  | 0.14              | 0.00                  | 0.00              | 0.36                  | 3.18              | 0.00                  | 0.00              | 0.28                  | 0.22              | 29.07                 | 263.67            | 0.00                  | 0.00              | 0.00                  | 0.00              |
|                         | Euro 3                      | <79,000                 |           | 0.03                  | 0.12              | 0.00                  | 0.02              | 0.00                  | 0.00              | 0.05                  | 0.47              | 0.00                  | 0.00              | 0.02                  | 0.01              | 6.06                  | 54.94             | 0.00                  | 0.01              | 0.00                  | 0.00              |
|                         | Euro 3                      | 80,000-161,000          |           | 0.02                  | 0.06              | 0.00                  | 0.01              | 0.00                  | 0.00              | 0.03                  | 0.22              | 0.00                  | 0.00              | 0.01                  | 0.01              | 2.80                  | 25.41             | 0.00                  | 0.00              | 0.00                  | 0.00              |
|                         | Euro 3                      | >161,000                |           | 0.19                  | 0.70              | 0.02                  | 0.13              | 0.00                  | 0.00              | 0.29                  | 2.55              | 0.00                  | 0.00              | 0.32                  | 0.23              | 31.54                 | 286.01            | 0.03                  | 0.03              | 0.00                  | 0.00              |
|                         |                             |                         |           | 1.70                  | 31.71             | 0.06                  | 0.64              | 0.63                  | 0.20              | 0.76                  | 6.96              | 0.00                  | 0.00              | 0.64                  | 0.48              | 87.50                 | 815.22            | 0.06                  | 0.07              | 0.04                  | 0.54              |
